# Supplementary material for: Time dependent DFT investigation of the optical properties of artificial light harvesting special pairs
Source: Royal Society of Chemistry journal article supplement (doi:10.1039/c6cp00300a), 2016-01-01
Supplement: c6cp00300a1.pdf [file c6cp00300a1.pdf]

### SUPPORTING INFORMATION

**Table S1:** Excitation energies (in eV) and oscillator strengths,  $f$ , of electronic transitions corresponding to the singlet excited states of  $(\text{ZnP})_2\text{X}$  and  $(\text{ZnTriPP})_2\text{X}$ , where  $(\text{X} = \text{DPA}, \text{DPB}, \text{DPO}, \text{DPS}, \text{DPX})$ , obtained at the TD-B3LYP/6-31G(d) level of theory *in vacuo* with a  $\text{C}_{2v}$  symmetry constraint.

| States                      | Composition of Transitions |      |         |     | E(eV) | f      |
|-----------------------------|----------------------------|------|---------|-----|-------|--------|
| <b>ZnP</b>                  |                            |      |         |     |       |        |
| S1( $1^1\text{E}_u$ )       | H→L                        | 50%  | H-1→L+1 | 49% | 2.45  | 0.0025 |
| S2( $1^1\text{E}_g$ )       | H-2→L+1                    | 100% |         |     | 3.34  | 0.0000 |
| S3( $2^1\text{E}_u$ )       | H-1→L+1                    | 46%  | H→L     | 48% | 3.55  | 0.9024 |
|                             | H-6→L+1                    | 4%   | H-3→L+1 | 4%  |       |        |
| <b>(ZnP)<sub>2</sub>DPA</b> |                            |      |         |     |       |        |
| S1( $1^1\text{A}_2$ )       | H-3→L+3                    | 20%  | H-2→L   | 24% | 2.41  | 0.0000 |
|                             | H-1→L+2                    | 25%  | H→L+1   | 29% |       |        |
| S2( $1^1\text{B}_2$ )       | H-3→L+1                    | 21%  | H-2→L+2 | 23% | 2.41  | 0.0000 |
|                             | H-1→L                      | 28%  | H→L+3   | 26% |       |        |
| S3( $1^1\text{B}_1$ )       | H→L                        | 33%  | H-1→L+3 | 23% | 2.41  | 0.0049 |
|                             | H-3→L+2                    | 23%  | H-2→L+1 | 20% |       |        |
| S4( $1^1\text{A}_1$ )       | H→L+2                      | 29%  | H-1→L+1 | 25% | 2.41  | 0.0008 |
|                             | H-3→L                      | 24%  | H-2→L+3 | 20% |       |        |
| S5( $2^1\text{B}_1$ )       | H→L                        | 49%  | H-2→L+1 | 47% | 2.58  | 0.0002 |
| S6( $2^1\text{A}_2$ )       | H-2→L                      | 45%  | H→L+1   | 53% | 2.58  | 0.0000 |
| S7( $2^1\text{B}_2$ )       | H→L+3                      | 49%  | H-2→L+2 | 39% | 2.61  | 0.0018 |
|                             | H-3→L+1                    | 4%   | H-1→L   | 8%  |       |        |
| S8( $2^1\text{A}_1$ )       | H→L+2                      | 46%  | H-2→L+3 | 46% | 2.61  | 0.0016 |
|                             | H-1→L+1                    | 6%   |         |     |       |        |
| S9( $3^1\text{A}_1$ )       | H-3→L                      | 49%  | H-1→L+1 | 45% | 2.62  | 0.0001 |
|                             | H-2→L+3                    | 3%   | H→L+2   | 3%  |       |        |
| S10( $3^1\text{B}_2$ )      | H-3→L+1                    | 48%  | H-1→L   | 40% | 2.62  | 0.0003 |
|                             | H-2→L+2                    | 7%   | H→L+3   | 5%  |       |        |
| S11( $3^1\text{B}_1$ )      | H-3→L+2                    | 50%  | H-1→L+3 | 50% | 2.64  | 0.0000 |
| S12( $3^1\text{A}_2$ )      | H-3→L+3                    | 51%  | H-1→L+2 | 48% | 2.64  | 0.0000 |
| S13( $4^1\text{B}_1$ )      | H-4→L                      | 87%  | H-2→L+1 | 9%  | 2.79  | 0.0036 |
| S14( $4^1\text{A}_2$ )      | H-4→L+1                    | 86%  | H-2→L   | 8%  | 2.80  | 0.0000 |
| S15( $4^1\text{B}_2$ )      | H-4→L+3                    | 83%  | H-3→L+1 | 2%  | 2.86  | 0.0169 |
|                             | H→L+3                      | 4%   | H-2→L+2 | 8%  |       |        |
| S16( $4^1\text{A}_1$ )      | H-4→L+2                    | 91%  | H-2→L+3 | 4%  | 2.87  | 0.0237 |
|                             | H→L+2                      | 3%   |         |     |       |        |

|                             |          |     |          |     |      |        |
|-----------------------------|----------|-----|----------|-----|------|--------|
| S17( $5^1A_2$ )             | H-1→L+4  | 99% |          |     | 2.92 | 0.0000 |
| S18( $5^1A_1$ )             | H→L+4    | 98% |          |     | 2.92 | 0.0325 |
| S19( $5^1B_1$ )             | H-3→L+4  | 99% |          |     | 2.93 | 0.0000 |
| S20( $5^1B_2$ )             | H-2→L+4  | 99% |          |     | 2.95 | 0.0009 |
| S21( $6^1A_1$ )             | H-4→L+4  | 95% |          |     | 3.25 | 0.2699 |
| S22( $6^1B_2$ )             | H-2→L+2  | 23% | H-3→L+1  | 22% | 3.30 | 0.0668 |
|                             | H-1→L    | 21% | H-4→L+3  | 15% |      |        |
|                             | H→L+3    | 15% |          |     |      |        |
| S23( $6^1A_2$ )             | H-6→L+1  | 48% | H-5→L    | 51% | 3.32 | 0.0000 |
| S24( $6^1B_1$ )             | H-5→L+1  | 48% | H-6→L    | 51% | 3.32 | 0.0000 |
| S25( $7^1A_1$ )             | H-5→L+3  | 49% | H-6→L+2  | 51% | 3.33 | 0.0000 |
| S26( $7^1B_2$ )             | H-5→L+2  | 51% | H-6→L+3  | 48% | 3.33 | 0.0006 |
| S27( $7^1A_2$ )             | H-4→L+1  | 11% | H-3→L+3  | 25% | 3.38 | 0.0000 |
|                             | H-2→L    | 22% | H-1→L+2  | 23% |      |        |
|                             | H→L+1    | 16% |          |     |      |        |
| S28( $7^1B_1$ )             | H-2→L+1  | 21% | H-3→L+2  | 20% | 3.59 | 1.1884 |
|                             | H-1→L+3  | 20% | H→L      | 14% |      |        |
|                             | H-16→L+2 | 2%  | H-7→L+1  | 6%  |      |        |
|                             | H-14→L+3 | 2%  | H-4→L    | 9%  |      |        |
|                             | H-9→L    | 4%  |          |     |      |        |
| S29( $8^1A_1$ )             | H-2→L+3  | 23% | H-3→L    | 20% | 3.61 | 1.6240 |
|                             | H-1→L+1  | 20% | H→L+2    | 17% |      |        |
|                             | H-16→L   | 3%  | H-14→L+1 | 3%  |      |        |
|                             | H-4→L+2  | 7%  | H-9→L+2  | 2%  |      |        |
| <b>(ZnP)<sub>2</sub>DPB</b> |          |     |          |     |      |        |
| S1( $1^1B_2$ )              | H-1→L+1  | 46% | H→L      | 48% | 2.31 | 0.0000 |
|                             | H-3→L+2  | 2%  | H-2→L+3  | 3%  |      |        |
| S2( $1^1A_2$ )              | H-1→L    | 47% | H→L+1    | 47% | 2.31 | 0.0000 |
|                             | H-3→L+3  | 2%  | H-2→L+2  | 3%  |      |        |
| S3( $1^1B_1$ )              | H-1→L+2  | 27% | H→L+3    | 26% | 2.42 | 0.0030 |
|                             | H-3→L+1  | 24% | H-2→L    | 23% |      |        |
| S4( $1^1A_1$ )              | H→L+2    | 28% | H-1→L+3  | 24% | 2.42 | 0.0005 |
|                             | H-2→L+1  | 24% | H-3→L    | 22% |      |        |
| S5( $2^1A_2$ )              | H-3→L+3  | 14% | H-2→L+2  | 14% | 2.54 | 0.0000 |
|                             | H-1→L    | 37% | H→L+1    | 35% |      |        |
| S6( $2^1B_2$ )              | H-1→L+1  | 37% | H→L      | 37% | 2.54 | 0.0120 |
|                             | H-3→L+2  | 16% | H-2→L+3  | 10% |      |        |
| S7( $2^1A_1$ )              | H-3→L    | 52% | H→L+2    | 47% | 2.56 | 0.0000 |
| S8( $2^1B_1$ )              | H-1→L+2  | 23% | H→L+3    | 24% | 2.57 | 0.0000 |

|                                     |         |     |          |     |      |        |
|-------------------------------------|---------|-----|----------|-----|------|--------|
|                                     | H-3→L+1 | 29% | H-2→L    | 25% |      |        |
| S9(3 <sup>1</sup> B <sub>1</sub> )  | H-1→L+2 | 26% | H→L+3    | 24% | 2.58 | 0.0000 |
|                                     | H-3→L+1 | 23% | H-2→L    | 27% |      |        |
| S10(3 <sup>1</sup> A <sub>1</sub> ) | H-2→L+1 | 50% | H-1→L+3  | 50% | 2.58 | 0.0001 |
| S11(3 <sup>1</sup> A <sub>2</sub> ) | H-3→L+3 | 47% | H-2→L+2  | 48% | 2.68 | 0.0000 |
|                                     | H-1→L   | 2%  | H→L+1    | 3%  |      |        |
| S12(3 <sup>1</sup> B <sub>2</sub> ) | H-2→L+3 | 48% | H-3→L+2  | 46% | 2.68 | 0.0005 |
|                                     | H-1→L+1 | 4%  |          |     |      |        |
| S13(4 <sup>1</sup> A <sub>2</sub> ) | H-4→L   | 97% |          |     | 2.90 | 0.0000 |
| S14(4 <sup>1</sup> B <sub>2</sub> ) | H-4→L+1 | 94% | H-4→L+4  | 2%  | 2.93 | 0.0018 |
| S15(4 <sup>1</sup> B <sub>1</sub> ) | H-4→L+2 | 97% |          |     | 3.06 | 0.0054 |
| S16(4 <sup>1</sup> A <sub>1</sub> ) | H-4→L+3 | 98% |          |     | 3.13 | 0.0195 |
| S17(5 <sup>1</sup> B <sub>2</sub> ) | H-1→L+4 | 57% | H-3→L+2  | 12% | 3.19 | 0.0264 |
|                                     | H-2→L+3 | 15% | H-4→L+1  | 4%  |      |        |
|                                     | H-4→L+4 | 2%  | H-1→L+1  | 5%  |      |        |
|                                     | H→L     | 4%  |          |     |      |        |
| S18(5 <sup>1</sup> A <sub>2</sub> ) | H→L+4   | 81% | H-3→L+3  | 8%  | 3.20 | 0.0000 |
|                                     | H-2→L+2 | 6%  | H→L+1    | 3%  |      |        |
| S19(6 <sup>1</sup> A <sub>2</sub> ) | H-6→L+2 | 30% | H-5→L    | 69% | 3.30 | 0.0000 |
| S20(5 <sup>1</sup> B <sub>1</sub> ) | H-6→L   | 69% | H-5→L+2  | 31% | 3.31 | 0.0001 |
| S21(6 <sup>1</sup> B <sub>2</sub> ) | H-5→L+1 | 66% | H-6→L+3  | 28% | 3.31 | 0.0018 |
|                                     | H-1→L+4 | 2%  |          |     |      |        |
| S22(5 <sup>1</sup> A <sub>1</sub> ) | H-6→L+1 | 69% | H-5→L+3  | 30% | 3.31 | 0.0001 |
| S23(7 <sup>1</sup> B <sub>2</sub> ) | H-1→L+4 | 32% | H-2→L+3  | 20% | 3.32 | 0.0383 |
|                                     | H-3→L+2 | 19% | H-5→L+1  | 4%  |      |        |
|                                     | H-4→L+4 | 5%  | H-1→L+1  | 7%  |      |        |
|                                     | H→L     | 8%  |          |     |      |        |
| S24(7 <sup>1</sup> A <sub>2</sub> ) | H-3→L+3 | 27% | H-2→L+2  | 27% | 3.37 | 0.0000 |
|                                     | H-1→L   | 11% | H→L+1    | 11% |      |        |
|                                     | H→L+4   | 18% |          |     |      |        |
| S25(6 <sup>1</sup> B <sub>1</sub> ) | H-3→L+4 | 88% | H-3→L+1  | 3%  | 3.37 | 0.0814 |
|                                     | H-2→L   | 3%  | H-1→L+2  | 2%  |      |        |
|                                     | H→L+3   | 3%  |          |     |      |        |
| S26(6 <sup>1</sup> A <sub>1</sub> ) | H-2→L+4 | 89% | H-3→L    | 2%  | 3.41 | 0.1947 |
|                                     | H-2→L+1 | 3%  | H-1→L+3  | 3%  |      |        |
|                                     | H→L+2   | 2%  |          |     |      |        |
| S27(8 <sup>1</sup> B <sub>2</sub> ) | H-4→L+4 | 89% | H-1→L+4  | 8%  | 3.44 | 0.0000 |
| S28(8 <sup>1</sup> A <sub>2</sub> ) | H-7→L   | 55% | H-12→L+2 | 4%  | 3.62 | 0.0000 |
|                                     | H-8→L+1 | 29% | H-9→L    | 5%  |      |        |

|                                     |                                                     |                               |                                                  |                              |      |        |
|-------------------------------------|-----------------------------------------------------|-------------------------------|--------------------------------------------------|------------------------------|------|--------|
|                                     | H-11→L+3                                            | 4%                            |                                                  |                              |      |        |
| S29(7 <sup>1</sup> A <sub>1</sub> ) | H-1→L+3<br>H-3→L<br>H→L+2<br>H-14→L+2<br>H-7→L+3    | 19%<br>18%<br>17%<br>3%<br>4% | H-2→L+1<br>H-2→L+4<br>H-15→L<br>H-10→L+1         | 19%<br>10%<br>3%<br>3%       | 3.64 | 1.4316 |
| S30(9 <sup>1</sup> B <sub>2</sub> ) | H-7→L+1<br>H-12→L+3                                 | 59%<br>3%                     | H-8→L<br>H-11→L+2                                | 31%<br>2%                    | 3.64 | 0.0018 |
| S31(7 <sup>1</sup> B <sub>1</sub> ) | H-3→L+1<br>H-1→L+2<br>H-15→L+1<br>H-12→L<br>H-7→L+2 | 14%<br>16%<br>3%<br>6%<br>8%  | H-2→L<br>H→L+3<br>H-14→L+3<br>H-8→L+3<br>H-3→L+4 | 17%<br>15%<br>2%<br>3%<br>9% | 3.65 | 0.9373 |
| <b>(ZnP)<sub>2</sub>DPO</b>         |                                                     |                               |                                                  |                              |      |        |
| S1(1 <sup>1</sup> B <sub>2</sub> )  | H→L+3<br>H-1→L                                      | 23%<br>26%                    | H-2→L+1<br>H→L+2                                 | 25%<br>26%                   | 2.42 | 0.0000 |
| S2(1 <sup>1</sup> A <sub>2</sub> )  | H-3→L+1<br>H-2→L+3                                  | 24%<br>23%                    | H-1→L+2<br>H→L                                   | 25%<br>27%                   | 2.42 | 0.0000 |
| S3(1 <sup>1</sup> B <sub>1</sub> )  | H→L+1<br>H-3→L                                      | 26%<br>25%                    | H-2→L+2<br>H-1→L+3                               | 25%<br>24%                   | 2.43 | 0.0047 |
| S4(1 <sup>1</sup> A <sub>1</sub> )  | H-2→L<br>H→L+3                                      | 26%<br>25%                    | H-1→L+1<br>H-3→L+2                               | 25%<br>24%                   | 2.43 | 0.0003 |
| S5(2 <sup>1</sup> A <sub>1</sub> )  | H-2→L                                               | 50%                           | H-1→L+1                                          | 50%                          | 2.70 | 0.0000 |
| S6(2 <sup>1</sup> B <sub>2</sub> )  | H-2→L+1                                             | 50%                           | H-1→L                                            | 50%                          | 2.70 | 0.0000 |
| S7(2 <sup>1</sup> B <sub>1</sub> )  | H-3→L                                               | 50%                           | H→L+1                                            | 50%                          | 2.70 | 0.0000 |
| S8(2 <sup>1</sup> A <sub>2</sub> )  | H-3→L+1                                             | 51%                           | H→L                                              | 49%                          | 2.70 | 0.0000 |
| S9(3 <sup>1</sup> B <sub>1</sub> )  | H-2→L+2                                             | 50%                           | H-1→L+3                                          | 50%                          | 2.72 | 0.0000 |
| S10(3 <sup>1</sup> A <sub>2</sub> ) | H-2→L+3                                             | 50%                           | H-1→L+2                                          | 50%                          | 2.72 | 0.0000 |
| S11(3 <sup>1</sup> A <sub>1</sub> ) | H-3→L+2                                             | 50%                           | H→L+3                                            | 50%                          | 2.72 | 0.0000 |
| S12(3 <sup>1</sup> B <sub>2</sub> ) | H-3→L+3                                             | 50%                           | H→L+2                                            | 50%                          | 2.72 | 0.0004 |
| S13(4 <sup>1</sup> A <sub>2</sub> ) | H-7→L+1                                             | 49%                           | H-6→L                                            | 50%                          | 3.31 | 0.0000 |
| S14(4 <sup>1</sup> B <sub>1</sub> ) | H-7→L                                               | 50%                           | H-6→L+1                                          | 49%                          | 3.31 | 0.0000 |
| S15(4 <sup>1</sup> B <sub>2</sub> ) | H-6→L+2                                             | 50%                           | H-7→L+3                                          | 49%                          | 3.34 | 0.0038 |
| S16(4 <sup>1</sup> A <sub>1</sub> ) | H-7→L+2                                             | 50%                           | H-6→L+3                                          | 49%                          | 3.34 | 0.0001 |
| S17(5 <sup>1</sup> B <sub>2</sub> ) | H-3→L+3<br>H-2→L+1                                  | 26%<br>22%                    | H→L+2<br>H-1→L                                   | 23%<br>22%                   | 3.36 | 0.3378 |
| S18(5 <sup>1</sup> A <sub>2</sub> ) | H-4→L<br>H-2→L+3<br>H→L                             | 10%<br>22%<br>20%             | H-3→L+1<br>H-1→L+2                               | 22%<br>21%                   | 3.42 | 0.0000 |

|                             |                                      |                       |                             |                  |      |        |
|-----------------------------|--------------------------------------|-----------------------|-----------------------------|------------------|------|--------|
| S19( $5^1B_1$ )             | H-4→L+1<br>H-2→L+2<br>H→L+1          | 42%<br>12%<br>13%     | H-3→L<br>H-1→L+3<br>H-2→L+4 | 14%<br>12%<br>2% | 3.50 | 0.6862 |
| S20( $5^1A_1$ )             | H-3→L+2<br>H-1→L+1<br>H-4→L+3        | 23%<br>21%<br>4%      | H→L+3<br>H-2→L<br>H-3→L+4   | 23%<br>21%<br>3% | 3.55 | 1.7771 |
| S21( $6^1A_2$ )             | H-4→L<br>H-2→L+3<br>H-5→L+1          | 84%<br>3%<br>5%       | H-1→L+2<br>H-1→L+4<br>H→L   | 3%<br>3%<br>2%   | 3.58 | 0.0000 |
| S22( $6^1B_1$ )             | H-5→L                                | 89%                   | H-4→L+1                     | 2%               | 3.60 | 0.0800 |
| S23( $7^1A_2$ )             | H-5→L+1                              | 93%                   | H-4→L                       | 5%               | 3.60 | 0.0000 |
| S24( $7^1B_1$ )             | H-4→L+1<br>H-2→L+2<br>H-5→L<br>H→L+1 | 49%<br>6%<br>8%<br>6% | H-2→L+4<br>H-3→L<br>H-1→L+3 | 18%<br>5%<br>6%  | 3.61 | 0.4027 |
| S25( $6^1B_2$ )             | H-4→L+2                              | 93%                   | H→L+4                       | 3%               | 3.64 | 0.0000 |
| S26( $6^1A_1$ )             | H-4→L+3                              | 89%                   | H-5→L+2                     | 4%               | 3.64 | 0.0419 |
| <b>(ZnP)<sub>2</sub>DPS</b> |                                      |                       |                             |                  |      |        |
| S1( $1^1B_2$ )              | H-2→L<br>H-3→L+1                     | 27%<br>24%            | H→L+2<br>H-1→L+3            | 24%<br>24%       | 2.42 | 0.0001 |
| S2( $1^1A_1$ )              | H-2→L+1<br>H→L+3                     | 26%<br>25%            | H-3→L<br>H-1→L+2            | 25%<br>24%       | 2.42 | 0.0004 |
| S3( $1^1A_2$ )              | H-3→L+3<br>H-2→L+2                   | 23%<br>25%            | H-1→L+1<br>H→L              | 25%<br>27%       | 2.42 | 0.0000 |
| S4( $1^1B_1$ )              | H-1→L<br>H-2→L+3                     | 26%<br>25%            | H→L+1<br>H-3→L+2            | 26%<br>23%       | 2.42 | 0.0063 |
| S5( $2^1A_2$ )              | H-1→L+1                              | 50%                   | H→L                         | 49%              | 2.73 | 0.0000 |
| S6( $2^1B_1$ )              | H-1→L                                | 49%                   | H→L+1                       | 50%              | 2.73 | 0.0000 |
| S7( $2^1A_1$ )              | H-3→L                                | 50%                   | H-2→L+1                     | 50%              | 2.74 | 0.0000 |
| S8( $2^1B_2$ )              | H-3→L+1                              | 51%                   | H-2→L                       | 49%              | 2.74 | 0.0006 |
| S9( $3^1B_2$ )              | H-1→L+3                              | 50%                   | H→L+2                       | 50%              | 2.76 | 0.0000 |
| S10( $3^1A_1$ )             | H-1→L+2                              | 50%                   | H→L+3                       | 50%              | 2.76 | 0.0000 |
| S11( $3^1B_1$ )             | H-3→L+2                              | 50%                   | H-2→L+3                     | 50%              | 2.78 | 0.0001 |
| S12( $3^1A_2$ )             | H-3→L+3                              | 51%                   | H-2→L+2                     | 49%              | 2.78 | 0.0000 |
| S13( $4^1A_2$ )             | H-4→L                                | 94%                   |                             |                  | 3.16 | 0.0000 |
| S14( $4^1B_1$ )             | H-4→L+1                              | 95%                   |                             |                  | 3.17 | 0.0189 |
| S15( $4^1B_2$ )             | H-4→L+2<br>H-2→L<br>H→L+2            | 84%<br>3%<br>3%       | H-3→L+1<br>H-1→L+3          | 4%<br>5%         | 3.25 | 0.1209 |

|                             |         |     |         |     |      |        |
|-----------------------------|---------|-----|---------|-----|------|--------|
| S16( $4^1A_1$ )             | H-4→L+3 | 98% |         |     | 3.27 | 0.0119 |
| S17( $5^1A_2$ )             | H-7→L+1 | 49% | H-6→L   | 51% | 3.31 | 0.0000 |
| S18( $5^1B_1$ )             | H-7→L   | 51% | H-6→L+1 | 49% | 3.31 | 0.0000 |
| S19( $5^1B_2$ )             | H-6→L+2 | 50% | H-7→L+3 | 50% | 3.34 | 0.0006 |
| S20( $5^1A_1$ )             | H-7→L+2 | 50% | H-6→L+3 | 50% | 3.34 | 0.0001 |
| S21( $6^1B_2$ )             | H→L+2   | 21% | H-1→L+3 | 20% | 3.39 | 0.5308 |
|                             | H-3→L+1 | 20% | H-2→L   | 18% |      |        |
|                             | H-4→L+2 | 15% |         |     |      |        |
| S22( $6^1A_2$ )             | H-5→L+1 | 19% | H-3→L+3 | 19% | 3.44 | 0.0000 |
|                             | H-2→L+2 | 18% | H-1→L+1 | 17% |      |        |
|                             | H→L     | 18% |         |     |      |        |
| S23( $6^1B_1$ )             | H-5→L   | 50% | H-3→L+2 | 11% | 3.48 | 0.5857 |
|                             | H-2→L+3 | 10% | H-1→L   | 10% |      |        |
|                             | H→L+1   | 11% | H-4→L+1 | 3%  |      |        |
| S24( $6^1A_1$ )             | H→L+3   | 23% | H-1→L+2 | 22% | 3.54 | 1.6849 |
|                             | H-3→L   | 21% | H-2→L+1 | 21% |      |        |
|                             | H-5→L+2 | 6%  |         |     |      |        |
| S26( $7^1B_1$ )             | H-5→L   | 47% | H-3→L+2 | 12% | 3.59 | 0.796  |
|                             | H→L+1   | 10% | H-2→L+3 | 11% |      |        |
|                             | H-1→L   | 11% | H-2→L+4 | 4%  |      |        |
| <b>(ZnP)<sub>2</sub>DPX</b> |         |     |         |     |      |        |
| S1( $1^1A_2$ )              | H-1→L   | 47% | H→L+1   | 45% | 2.35 | 0.0000 |
|                             | H-3→L+3 | 3%  | H-2→L+2 | 4%  |      |        |
| S2( $1^1B_2$ )              | H-1→L+1 | 43% | H→L     | 50% | 2.35 | 0.0000 |
|                             | H-3→L+2 | 3%  | H-2→L+3 | 4%  |      |        |
| S3( $1^1B_1$ )              | H→L+3   | 28% | H-1→L+2 | 27% | 2.42 | 0.0033 |
|                             | H-2→L   | 23% | H-3→L+1 | 22% |      |        |
| S4( $1^1A_1$ )              | H→L+2   | 31% | H-1→L+3 | 25% | 2.43 | 0.0001 |
|                             | H-2→L+1 | 23% | H-3→L   | 21% |      |        |
| S5( $2^1B_2$ )              | H-3→L+2 | 22% | H-2→L+3 | 11% | 2.56 | 0.0000 |
|                             | H-1→L+1 | 35% | H→L     | 32% |      |        |
| S6( $2^1A_2$ )              | H-3→L+3 | 15% | H-1→L   | 34% | 2.56 | 0.0000 |
|                             | H-2→L+2 | 18% | H→L+1   | 33% |      |        |
| S7( $2^1A_1$ )              | H-3→L   | 54% | H→L+2   | 45% | 2.57 | 0.0001 |
| S8( $2^1B_1$ )              | H-2→L   | 51% | H-1→L+2 | 46% | 2.58 | 0.0000 |
| S9( $3^1B_1$ )              | H-3→L+1 | 51% | H→L+3   | 47% | 2.58 | 0.0001 |
| S10( $3^1A_1$ )             | H-2→L+1 | 51% | H-1→L+3 | 49% | 2.59 | 0.0000 |
| S11( $3^1A_2$ )             | H-3→L+3 | 47% | H-1→L   | 3%  | 2.65 | 0.0000 |
|                             | H-2→L+2 | 46% | H→L+1   | 5%  |      |        |

|                                 |                                          |                        |                                         |                        |      |        |
|---------------------------------|------------------------------------------|------------------------|-----------------------------------------|------------------------|------|--------|
| S12( $3^1B_2$ )                 | H-3→L+2<br>H-2→L+3                       | 41%<br>50%             | H-1→L+1                                 | 6%                     | 2.65 | 0.0000 |
| S13( $4^1B_1$ )                 | H-4→L                                    | 99%                    |                                         |                        | 3.18 | 0.0002 |
| S14( $4^1A_1$ )                 | H-4→L+1                                  | 100%                   |                                         |                        | 3.25 | 0.0001 |
| S15( $4^1B_2$ )                 | H-2→L+3<br>H-1→L+1<br>H-4→L+3            | 34%<br>16%<br>2%       | H-3→L+2<br>H→L                          | 31%<br>15%             | 3.28 | 0.0082 |
| S16( $4^1A_2$ )                 | H-4→L+2                                  | 91%                    | H-5→L                                   | 2%                     | 3.30 | 0.0000 |
| S17( $5^1A_2$ )                 | H-6→L+2<br>H-4→L+2                       | 32%<br>5%              | H-5→L                                   | 60%                    | 3.31 | 0.0000 |
| S18( $5^1B_1$ )                 | H-6→L                                    | 64%                    | H-5→L+2                                 | 35%                    | 3.31 | 0.0000 |
| S19( $5^1B_2$ )                 | H-6→L+3                                  | 34%                    | H-5→L+1                                 | 66%                    | 3.32 | 0.0000 |
| S20( $5^1A_1$ )                 | H-6→L+1                                  | 65%                    | H-5→L+3                                 | 35%                    | 3.32 | 0.0001 |
| S21( $6^1A_2$ )                 | H-5→L<br>H-2→L+2<br>H→L+1                | 3%<br>30%<br>15%       | H-3→L+3<br>H-1→L<br>H-4→L+2             | 32%<br>15%<br>3%       | 3.33 | 0.0000 |
| S22( $6^1B_2$ )                 | H-4→L+3                                  | 98%                    |                                         |                        | 3.38 | 0.0012 |
| S23( $6^1B_1$ )                 | H-2→L<br>H-3→L+1<br>H-16→L+1<br>H-14→L+3 | 21%<br>20%<br>2%<br>3% | H-1→L+2<br>H→L+3<br>H-10→L<br>H-7→L+2   | 21%<br>19%<br>6%<br>6% | 3.62 | 1.0817 |
| S24( $6^1A_1$ )                 | H-2→L+1<br>H-3→L<br>H-16→L<br>H-14→L+2   | 23%<br>21%<br>3%<br>3% | H-1→L+3<br>H→L+2<br>H-10→L+1<br>H-7→L+3 | 23%<br>20%<br>3%<br>3% | 3.62 | 1.7342 |
| <b>ZnTriP</b>                   |                                          |                        |                                         |                        |      |        |
| S1( $1^1A_1$ )                  | H-1→L                                    | 48%                    | H→L+1                                   | 52%                    | 2.38 | 0.0000 |
| S2( $1^1B_2$ )                  | H→L                                      | 53%                    | H-1→L+1                                 | 47%                    | 2.38 | 0.0009 |
| S3( $1^1B_1$ )                  | H-2→L                                    | 100%                   |                                         |                        | 3.30 | 0.0000 |
| S4( $1^1A_2$ )                  | H-2→L+1                                  | 100%                   |                                         |                        | 3.30 | 0.0000 |
| S5( $2^1B_2$ )                  | H→L<br>H-12→L                            | 45%<br>2%              | H-1→L+1                                 | 52%                    | 3.39 | 1.3841 |
| S6( $2^1A_1$ )                  | H-1→L<br>H-12→L+1                        | 51%<br>3%              | H→L+1                                   | 45%                    | 3.40 | 1.0192 |
| <b>(ZnTriPP)<sub>2</sub>DPA</b> |                                          |                        |                                         |                        |      |        |
| S1( $1^1B_2$ )                  | H-3→L+3<br>H→L+1                         | 19%<br>27%             | H-1→L+2<br>H-2→L                        | 26%<br>26%             | 2.33 | 0.0000 |
| S2( $1^1A_1$ )                  | H-2→L+3<br>H→L+2                         | 27%<br>26%             | H-1→L+1<br>H-3→L                        | 26%<br>20%             | 2.33 | 0.0019 |
| S3( $1^1A_2$ )                  | H-2→L+2<br>H-1→L                         | 27%<br>27%             | H-3→L+1<br>H→L+3                        | 19%<br>26%             | 2.33 | 0.0000 |
| S4( $1^1B_1$ )                  | H-2→L+1<br>H-1→L+3                       | 28%<br>25%             | H→L<br>H-3→L+2                          | 26%<br>19%             | 2.33 | 0.0080 |
| S5( $2^1B_2$ )                  | H-1→L+2                                  | 50%                    | H→L+1                                   | 50%                    | 2.53 | 0.0000 |

|                                     |                             |                   |                             |                  |      |        |
|-------------------------------------|-----------------------------|-------------------|-----------------------------|------------------|------|--------|
| S6(2 <sup>1</sup> A <sub>1</sub> )  | H-1→L+1                     | 50%               | H→L+2                       | 50%              | 2.53 | 0.0000 |
| S7(2 <sup>1</sup> B <sub>1</sub> )  | H-1→L+3                     | 50%               | H→L                         | 50%              | 2.53 | 0.0000 |
| S8(2 <sup>1</sup> A <sub>2</sub> )  | H-1→L                       | 49%               | H→L+3                       | 51%              | 2.53 | 0.0000 |
| S9(3 <sup>1</sup> B <sub>1</sub> )  | H-2→L+1<br>H-4→L+1          | 54%<br>4%         | H-3→L+2                     | 40%              | 2.57 | 0.0058 |
| S10(3 <sup>1</sup> A <sub>2</sub> ) | H-3→L+1<br>H-4→L+2          | 39%<br>3%         | H-2→L+2                     | 56%              | 2.57 | 0.0000 |
| S11(3 <sup>1</sup> B <sub>2</sub> ) | H-2→L                       | 56%               | H-2→L+3                     | 41%              | 2.59 | 0.0065 |
| S12(3 <sup>1</sup> A <sub>1</sub> ) | H-2→L+3                     | 53%               | H-3→L                       | 46%              | 2.59 | 0.0063 |
| S13(4 <sup>1</sup> B <sub>1</sub> ) | H-4→L+1                     | 81%               | H-3→L+2                     | 15%              | 2.78 | 0.0222 |
| S14(4 <sup>1</sup> A <sub>2</sub> ) | H-4→L+2                     | 77%               | H-3→L+1                     | 17%              | 2.78 | 0.0000 |
| S15(4 <sup>1</sup> B <sub>2</sub> ) | H-4→L<br>H-1→L+2<br>H→L+1   | 76%<br>3%<br>2%   | H-2→L<br>H-3→L+3            | 3%<br>15%        | 2.81 | 0.0307 |
| S16(5 <sup>1</sup> A <sub>2</sub> ) | H→L+4                       | 99%               |                             |                  | 2.84 | 0.0000 |
| S17(4 <sup>1</sup> A <sub>1</sub> ) | H-4→L+3<br>H-3→L            | 88%<br>8%         | H-2→L+3                     | 2%               | 2.84 | 0.0528 |
| S18(5 <sup>1</sup> B <sub>1</sub> ) | H-1→L+4                     | 99%               |                             |                  | 2.84 | 0.0001 |
| S19(5 <sup>1</sup> A <sub>1</sub> ) | H-2→L+4                     | 98%               |                             |                  | 2.91 | 0.0536 |
| S20(5 <sup>1</sup> B <sub>2</sub> ) | H-3→L+4                     | 99%               |                             |                  | 2.95 | 0.0003 |
| S21(6 <sup>1</sup> B <sub>2</sub> ) | H-3→L+3<br>H-1→L+2<br>H-2→L | 25%<br>19%<br>14% | H-4→L<br>H→L+1              | 20%<br>19%       | 3.18 | 0.1455 |
| S22(6 <sup>1</sup> A <sub>2</sub> ) | H-3→L+1<br>H-2→L+2<br>H-1→L | 25%<br>16%<br>20% | H-4→L+2<br>H→L+3            | 17%<br>20%       | 3.20 | 0.0000 |
| S23(6 <sup>1</sup> A <sub>1</sub> ) | H-4→L+4                     | 90%               | H-3→L                       | 2%               | 3.25 | 0.5015 |
| S24(7 <sup>1</sup> A <sub>2</sub> ) | H-6→L+2                     | 49%               | H-5→L+1                     | 50%              | 3.28 | 0.0000 |
| S25(6 <sup>1</sup> B <sub>1</sub> ) | H-6→L+1                     | 50%               | H-5→L+2                     | 49%              | 3.28 | 0.0006 |
| S26(7 <sup>1</sup> B <sub>2</sub> ) | H-6→L                       | 50%               | H-5→L+3                     | 49%              | 3.29 | 0.0001 |
| S27(7 <sup>1</sup> A <sub>1</sub> ) | H-6→L+3                     | 49%               | H-5→L                       | 50%              | 3.29 | 0.0000 |
| S28(7 <sup>1</sup> B <sub>1</sub> ) | H-3→L+2<br>H→L<br>H-4→L+1   | 25%<br>20%<br>13% | H-1→L+3<br>H-2→L+1          | 20%<br>16%       | 3.41 | 2.3128 |
| S29(8 <sup>1</sup> A <sub>1</sub> ) | H-3→L<br>H-1→L+1<br>H-4→L+3 | 23%<br>19%<br>9%  | H→L+2<br>H-2→L+3<br>H-4→L+4 | 19%<br>16%<br>7% | 3.42 | 1.5154 |
| <b>(ZnTriPP)<sub>2</sub>DPB</b>     |                             |                   |                             |                  |      |        |
| S1(1 <sup>1</sup> B <sub>2</sub> )  | H-1→L+3<br>H-3→L+2          | 10%<br>10%        | H→L+1<br>H-2→L              | 47%<br>32%       | 2.30 | 0.0004 |
| S2(1 <sup>1</sup> A <sub>2</sub> )  | H-3→L+3<br>H-1→L+2          | 10%<br>9%         | H-2→L+1<br>H→L              | 30%<br>51%       | 2.30 | 0.0000 |
| S3(1 <sup>1</sup> A <sub>1</sub> )  | H-1→L+1<br>H-3→L            | 30%<br>23%        | H→L+3<br>H-2→L+2            | 24%<br>23%       | 2.33 | 0.0028 |
| S4(1 <sup>1</sup> B <sub>1</sub> )  | H-1→L<br>H-3→L+1            | 31%<br>22%        | H→L+2<br>H-2→L+3            | 25%<br>21%       | 2.33 | 0.0158 |
| S5(2 <sup>1</sup> B <sub>1</sub> )  | H-1→L                       | 48%               | H→L+2                       | 52%              | 2.48 | 0.0000 |
| S6(2 <sup>1</sup> A <sub>2</sub> )  | H-1→L+2<br>H-2→L+1          | 59%<br>8%         | H→L                         | 32%              | 2.49 | 0.0000 |
| S7(2 <sup>1</sup> A <sub>1</sub> )  | H→L+3                       | 53%               | H-1→L+1                     | 47%              | 2.49 | 0.0001 |
| S8(2 <sup>1</sup> B <sub>2</sub> )  | H-1→L+3                     | 55%               | H→L+1                       | 36%              | 2.50 | 0.0069 |



|                                     |                               |                   |                             |                  |      |        |
|-------------------------------------|-------------------------------|-------------------|-----------------------------|------------------|------|--------|
|                                     | H-2→L                         | 9%                |                             |                  |      |        |
| S9(3 <sup>1</sup> A <sub>1</sub> )  | H-3→L                         | 50%               | H-2→L+2                     | 50%              | 2.59 | 0.0002 |
| S10(3 <sup>1</sup> B <sub>2</sub> ) | H-3→L+2<br>H-1→L+3            | 51%<br>8%         | H-2→L                       | 40%              | 2.59 | 0.0089 |
| S11(3 <sup>1</sup> B <sub>1</sub> ) | H-3→L+1                       | 49%               | H-2→L+3                     | 51%              | 2.60 | 0.0000 |
| S12(3 <sup>1</sup> A <sub>2</sub> ) | H-3→L+3<br>H-1→L+2            | 51%<br>6%         | H-2→L+1                     | 42%              | 2.60 | 0.0000 |
| S13(4 <sup>1</sup> A <sub>2</sub> ) | H-4→L+1                       | 94%               | H-3→L+3                     | 3%               | 2.90 | 0.0000 |
| S14(4 <sup>1</sup> B <sub>2</sub> ) | H-4→L<br>H-3→L+2              | 90%<br>4%         | H-4→L+4                     | 2%               | 2.91 | 0.0081 |
| S15(4 <sup>1</sup> B <sub>1</sub> ) | H-4→L+3                       | 96%               |                             |                  | 2.99 | 0.0195 |
| S16(4 <sup>1</sup> A <sub>1</sub> ) | H-4→L+2                       | 98%               |                             |                  | 3.02 | 0.0275 |
| S17(5 <sup>1</sup> B <sub>2</sub> ) | H-3→L+2<br>H-2→L<br>H-2→L+4   | 31%<br>15%<br>10% | H-1→L+3<br>H→L+1<br>H-4→L   | 22%<br>13%<br>7% | 3.12 | 0.1809 |
| S18(5 <sup>1</sup> A <sub>2</sub> ) | H-3→L+3<br>H-2→L+1<br>H→L+4   | 24%<br>13%<br>30% | H-1→L+2<br>H→L<br>H-4→L+1   | 18%<br>11%<br>3% | 3.13 | 0.0000 |
| S19(5 <sup>1</sup> B <sub>1</sub> ) | H-3→L+1<br>H-2→L+3<br>H→L+2   | 5%<br>5%<br>5%    | H-1→L+4<br>H-1→L            | 80%<br>4%        | 3.24 | 0.2711 |
| S20(6 <sup>1</sup> A <sub>2</sub> ) | H-3→L+3<br>H-2→L+1<br>H→L+4   | 10%<br>6%<br>69%  | H-2→L+1<br>H→L              | 6%<br>5%         | 3.25 | 0.0000 |
| S21(6 <sup>1</sup> B <sub>2</sub> ) | H-6→L+2                       | 41%               | H-5→L                       | 58%              | 3.28 | 0.0000 |
| S22(5 <sup>1</sup> A <sub>1</sub> ) | H-6→L                         | 58%               | H-5→L+2                     | 41%              | 3.28 | 0.0022 |
| S23(7 <sup>1</sup> A <sub>2</sub> ) | H-6→L+3                       | 40%               | H-5→L+1                     | 59%              | 3.28 | 0.0000 |
| S24(6 <sup>1</sup> B <sub>1</sub> ) | H-6→L+1                       | 58%               | H-5→L+3                     | 40%              | 3.28 | 0.0001 |
| S25(7 <sup>1</sup> B <sub>2</sub> ) | H-4→L+4<br>H-3→L+2<br>H-1→L+3 | 16%<br>3%<br>3%   | H-2→L+4<br>H-2→L<br>H→L+1   | 72%<br>2%<br>2%  | 3.32 | 0.0193 |
| S26(6 <sup>1</sup> A <sub>1</sub> ) | H-3→L<br>H-2→L+2<br>H→L+3     | 14%<br>15%<br>12% | H-3→L+4<br>H-1→L+1          | 45%<br>11%       | 3.35 | 1.0558 |
| S27(7 <sup>1</sup> B <sub>1</sub> ) | H-3→L+1<br>H-1→L<br>H-1→L+4   | 21%<br>15%<br>18% | H-2→L+3<br>H→L+2<br>H-4→L+3 | 20%<br>16%<br>2% | 3.44 | 2.0516 |
| S29(7 <sup>1</sup> A <sub>1</sub> ) | H-3→L<br>H-2→L+2<br>H-1→L+1   | 10%<br>11%<br>9%  | H-3→L+4<br>H→L+3            | 54%<br>10%       | 3.47 | 0.8018 |
| <b>(ZnTriPP)<sub>2</sub>DPO</b>     |                               |                   |                             |                  |      |        |
| S1(1 <sup>1</sup> B <sub>2</sub> )  | H→L<br>H-2→L+1                | 28%<br>23%        | H-1→L+2<br>H-3→L+3          | 27%<br>21%       | 2.34 | 0.0008 |
| S2(1 <sup>1</sup> A <sub>1</sub> )  | H-1→L<br>H-2→L+3              | 27%<br>23%        | H→L+2<br>H-3→L+1            | 27%<br>22%       | 2.34 | 0.0039 |
| S3(1 <sup>1</sup> A <sub>2</sub> )  | H-1→L+3<br>H-2→L              | 26%<br>23%        | H-3→L+2<br>H→L+1            | 21%<br>28%       | 2.34 | 0.0000 |
| S4(1 <sup>1</sup> B <sub>1</sub> )  | H-1→L+1<br>H-2→L+2            | 28%<br>22%        | H→L+3<br>H-3→L              | 26%<br>22%       | 2.34 | 0.0092 |
| S5(2 <sup>1</sup> A <sub>1</sub> )  | H-1→L                         | 50%               | H→L+2                       | 50%              | 2.58 | 0.0000 |

|                                     |                           |                   |                    |            |      |        |
|-------------------------------------|---------------------------|-------------------|--------------------|------------|------|--------|
| S6(2 <sup>1</sup> B <sub>2</sub> )  | H-1→L+2                   | 50%               | H→L                | 50%        | 2.58 | 0.0000 |
| S7(2 <sup>1</sup> B <sub>1</sub> )  | H-1→L+1                   | 50%               | H→L+3              | 50%        | 2.58 | 0.0000 |
| S8(2 <sup>1</sup> A <sub>2</sub> )  | H-1→L+3                   | 51%               | H→L+1              | 49%        | 2.58 | 0.0000 |
| S9(3 <sup>1</sup> A <sub>2</sub> )  | H-3→L+2                   | 50%               | H-2→L              | 50%        | 2.67 | 0.0000 |
| S10(3 <sup>1</sup> B <sub>1</sub> ) | H-3→L                     | 50%               | H-2→L+2            | 50%        | 2.67 | 0.0000 |
| S11(3 <sup>1</sup> B <sub>2</sub> ) | H-3→L+3                   | 50%               | H-2→L+1            | 50%        | 2.68 | 0.0005 |
| S12(3 <sup>1</sup> A <sub>1</sub> ) | H-3→L+1                   | 50%               | H-2→L+3            | 50%        | 2.68 | 0.0000 |
| S13(4 <sup>1</sup> B <sub>2</sub> ) | H-3→L+3<br>H-1→L+2        | 29%<br>21%        | H-2→L+1<br>H→L     | 26%<br>21% | 3.20 | 0.3317 |
| S14(4 <sup>1</sup> A <sub>2</sub> ) | H-3→L+2<br>H-1→L+3        | 28%<br>22%        | H-2→L<br>H→L+1     | 26%<br>21% | 3.22 | 0.0000 |
| S15(5 <sup>1</sup> A <sub>2</sub> ) | H-7→L+2                   | 49%               | H-6→L              | 50%        | 3.28 | 0.0000 |
| S16(4 <sup>1</sup> B <sub>1</sub> ) | H-7→L                     | 50%               | H-6→L+2            | 49%        | 3.28 | 0.0000 |
| S17(4 <sup>1</sup> A <sub>1</sub> ) | H-7→L+1                   | 50%               | H-6→L+3            | 49%        | 3.29 | 0.0012 |
| S18(5 <sup>1</sup> B <sub>2</sub> ) | H-6→L+1                   | 50%               | H-7→L+3            | 49%        | 3.29 | 0.0004 |
| S19(5 <sup>1</sup> B <sub>1</sub> ) | H-3→L<br>H→L+3<br>H-4→L+2 | 25%<br>20%<br>7%  | H-2→L+2<br>H-1→L+1 | 23%<br>19% | 3.36 | 2.1082 |
| S20(5 <sup>1</sup> A <sub>1</sub> ) | H-3→L+1<br>H→L+2          | 26%<br>21%        | H-2→L+3<br>H-1→L   | 26%<br>21% | 3.39 | 1.9706 |
| <b>(ZnTriPP)<sub>2</sub>DPS</b>     |                           |                   |                    |            |      |        |
| S1(1 <sup>1</sup> B <sub>2</sub> )  | H→L<br>H-2→L+2            | 30%<br>22%        | H-1→L+1<br>H-3→L+3 | 26%<br>21% | 2.33 | 0.0024 |
| S2(1 <sup>1</sup> A <sub>1</sub> )  | H→L+1<br>H-2→L+3          | 27%<br>23%        | H-1→L<br>H-3→L+2   | 27%<br>22% | 2.34 | 0.0038 |
| S3(1 <sup>1</sup> A <sub>2</sub> )  | H→L+2<br>H-2→L            | 28%<br>24%        | H-1→L+3<br>H-3→L+1 | 26%<br>22% | 2.34 | 0.0000 |
| S4(1 <sup>1</sup> B <sub>1</sub> )  | H→L+3<br>H-3→L            | 28%<br>23%        | H-1→L+2<br>H-2→L+1 | 26%<br>23% | 2.34 | 0.0087 |
| S5(2 <sup>1</sup> A <sub>1</sub> )  | H-1→L                     | 50%               | H→L+1              | 50%        | 2.62 | 0.0000 |
| S6(2 <sup>1</sup> B <sub>2</sub> )  | H-1→L+1                   | 51%               | H→L                | 49%        | 2.62 | 0.0005 |
| S7(2 <sup>1</sup> B <sub>1</sub> )  | H-1→L+2                   | 51%               | H→L+3              | 49%        | 2.64 | 0.0000 |
| S8(2 <sup>1</sup> A <sub>2</sub> )  | H-1→L+3                   | 51%               | H→L+2              | 49%        | 2.64 | 0.0000 |
| S9(3 <sup>1</sup> A <sub>2</sub> )  | H-3→L+1                   | 50%               | H-2→L              | 50%        | 2.70 | 0.0000 |
| S10(3 <sup>1</sup> B <sub>1</sub> ) | H-3→L                     | 49%               | H-2→L+1            | 50%        | 2.70 | 0.0000 |
| S11(3 <sup>1</sup> B <sub>2</sub> ) | H-2→L+2                   | 50%               | H-3→L+3            | 50%        | 2.72 | 0.0001 |
| S12(3 <sup>1</sup> A <sub>1</sub> ) | H-2→L+3                   | 50%               | H-3→L+2            | 50%        | 2.72 | 0.0000 |
| S13(4 <sup>1</sup> A <sub>2</sub> ) | H-4→L<br>H-3→L+1<br>H→L+2 | 79%<br>7%<br>4%   | H-2→L<br>H-1→L+3   | 4%<br>4%   | 3.13 | 0.0000 |
| S14(4 <sup>1</sup> B <sub>1</sub> ) | H-4→L+1                   | 89%               | H-3→L              | 4%         | 3.15 | 0.1320 |
| S15(4 <sup>1</sup> B <sub>2</sub> ) | H-4→L+2<br>H-2→L+2<br>H→L | 34%<br>17%<br>13% | H-3→L+3<br>H-1→L+1 | 20%<br>14% | 3.17 | 0.4959 |
| S16(4 <sup>1</sup> A <sub>1</sub> ) | H-4→L+3                   | 94%               |                    |            | 3.23 | 0.0602 |
| S17(5 <sup>1</sup> A <sub>2</sub> ) | H-4→L<br>H-2→L<br>H→L+2   | 19%<br>21%<br>17% | H-3→L+1<br>H-1→L+3 | 20%<br>18% | 3.27 | 0.0000 |
| S18(5 <sup>1</sup> B <sub>2</sub> ) | H-4→L+2<br>H-2→L+2<br>H→L | 66%<br>10%<br>7%  | H-3→L+3<br>H-1→L+1 | 8%<br>8%   | 3.27 | 0.2109 |

|                                 |         |     |         |     |      |        |
|---------------------------------|---------|-----|---------|-----|------|--------|
| S19( $5^1B_1$ )                 | H-7→L   | 50% | H-6→L+1 | 49% | 3.28 | 0.0000 |
| S20( $6^1A_2$ )                 | H-7→L+1 | 49% | H-6→L   | 50% | 3.28 | 0.0000 |
| S21( $5^1A_1$ )                 | H-7→L+2 | 50% | H-6→L+3 | 49% | 3.30 | 0.0001 |
| S22( $6^1B_2$ )                 | H-6→L+2 | 50% | H-7→L+3 | 49% | 3.30 | 0.0001 |
| S23( $6^1B_1$ )                 | H-2→L+1 | 22% | H-3→L   | 21% | 3.35 | 2.0584 |
|                                 | H-1→L+2 | 18% | H→L+3   | 18% |      |        |
|                                 | H-4→L+1 | 10% | H-5→L   | 7%  |      |        |
| S24( $6^1A_1$ )                 | H-2→L+3 | 25% | H-3→L+2 | 25% | 3.37 | 1.7907 |
|                                 | H-1→L   | 20% | H→L+1   | 20% |      |        |
|                                 | H-4→L+3 | 5%  |         |     |      |        |
| <b>(ZnTriPP)<sub>2</sub>DPX</b> |         |     |         |     |      |        |
| S1( $1^1B_2$ )                  | H→L+1   | 35% | H-2→L   | 25% | 2.33 | 0.0001 |
|                                 | H-1→L+3 | 21% | H-3→L+2 | 19% |      |        |
| S2( $1^1A_2$ )                  | H-3→L+3 | 18% | H-1→L+2 | 22% | 2.33 | 0.0000 |
|                                 | H-2→L+1 | 25% | H→L     | 34% |      |        |
| S3( $1^1A_1$ )                  | H-1→L+1 | 27% | H→L+3   | 27% | 2.33 | 0.0040 |
|                                 | H-2→L+2 | 23% | H-3→L   | 22% |      |        |
| S4( $1^1B_1$ )                  | H→L+2   | 29% | H-1→L   | 26% | 2.33 | 0.0143 |
|                                 | H-3→L+1 | 22% | H-2→L+3 | 22% |      |        |
| S5( $2^1B_1$ )                  | H-1→L   | 51% | H→L+2   | 49% | 2.50 | 0.0000 |
| S6( $2^1A_2$ )                  | H-1→L+2 | 55% | H→L     | 45% | 2.50 | 0.0000 |
| S7( $2^1A_1$ )                  | H-1→L+1 | 50% | H→L+3   | 50% | 2.50 | 0.0000 |
| S8( $2^1B_2$ )                  | H-1→L+3 | 55% | H→L+1   | 44% | 2.51 | 0.0002 |
| S9( $3^1A_1$ )                  | H-3→L   | 50% | H-2→L+2 | 50% | 2.61 | 0.0000 |
| S10( $3^1B_2$ )                 | H-3→L+2 | 51% | H-2→L   | 49% | 2.61 | 0.0003 |
| S11( $3^1B_1$ )                 | H-3→L+1 | 50% | H-2→L+3 | 50% | 2.60 | 0.0000 |
| S12( $3^1A_2$ )                 | H-3→L+3 | 51% | H-2→L+1 | 49% | 2.61 | 0.0000 |
| S13( $4^1B_2$ )                 | H-3→L+2 | 28% | H-2→L   | 26% | 3.16 | 0.1038 |
|                                 | H-1→L+3 | 23% | H→L+1   | 20% |      |        |
|                                 | H-4→L+2 | 2%  |         |     |      |        |
| S14( $4^1A_2$ )                 | H-3→L+3 | 29% | H-2→L+1 | 25% | 3.16 | 0.0000 |
|                                 | H-1→L+2 | 21% | H→L     | 19% |      |        |
|                                 | H-4→L+3 | 3%  |         |     |      |        |
| S15( $4^1B_1$ )                 | H-4→L+1 | 98% |         |     | 3.20 | 0.0098 |
| S16( $5^1A_2$ )                 | H-4→L+3 | 95% |         |     | 3.23 | 0.0000 |
| S17( $4^1A_1$ )                 | H-4→L   | 99% |         |     | 3.26 | 0.0017 |
| S18( $5^1B_2$ )                 | H-4→L+2 | 96% |         |     | 3.27 | 0.0000 |
| S19( $5^1B_1$ )                 | H-6→L+1 | 52% | H-5→L+3 | 47% | 3.29 | 0.0040 |
| S20( $6^1A_2$ )                 | H-6→L+3 | 47% | H-5→L+1 | 52% | 3.29 | 0.0000 |
| S21( $5^1A_1$ )                 | H-6→L   | 51% | H-5→L+2 | 48% | 3.29 | 0.0019 |
| S22( $6^1B_2$ )                 | H-5→L   | 51% | H-6→L+2 | 47% | 3.29 | 0.0002 |
| S23( $6^1B_1$ )                 | H-2→L+3 | 26% | H-3→L+1 | 26% | 3.39 | 2.3041 |
|                                 | H-1→L   | 21% | H→L+2   | 20% |      |        |
| S24( $6^1A_1$ )                 | H-3→L   | 26% | H-2→L+2 | 26% | 3.40 | 1.9957 |
|                                 | H→L+3   | 21% | H-1→L+1 | 21% |      |        |
